# Supplementary material for: 73) オゾンガスによるチューリップ各種病原菌の殺菌効果 (関西部会)
Source: Royal Society of Chemistry journal article supplement (doi:10.1039/d3dt04276f), 1993-12-25
Supplement: d3dt04276f1.pdf [file d3dt04276f1.pdf]

## Supporting Information

### **Ultra-high photoelectric conversion efficiency and obvious carrier separation in a photovoltaic $\text{ZnIn}_2\text{X}_4$ (X = S, Se and Te) van der Waals heterostructures**

Zheng Liang<sup>1</sup>, Yao-Zhong Liu<sup>1</sup>, Ze-Ting Gong<sup>1</sup>, Jun-Yao Li<sup>1</sup>, Yong-Sheng Yao<sup>1</sup>, Zhen-Kun Tang<sup>1\*</sup>,  
Xiao-Lin Wei<sup>1\*</sup>

<sup>1</sup> Key Laboratory of Micro-nano Energy Materials and Application Technologies, University of Hunan Province &  
College of Physics and Electronics Engineering, Hengyang Normal University, Hengyang 421002, China

\*Email: [zktang@hynu.edu.cn](mailto:zktang@hynu.edu.cn), [xlw@xtu.edu.cn](mailto:xlw@xtu.edu.cn)

**Table S1**

Calculated lattice constants  $a/b$  (Å) of ZIX ( $X=S, Se$  and  $Te$ ) monolayer and its heterostructures. For comparison, the relaxed lattice constants of the previous ZIX monolayer also listed.

| Structure                         | $a/b$ (Å) | $a/b$ (Å, Ref. 39) | $a/b$ (Å, Ref. 40) |
|-----------------------------------|-----------|--------------------|--------------------|
| ZnIn <sub>2</sub> S <sub>4</sub>  | 6.71/3.88 | 6.78/3.93          | 6.68/3.87          |
| ZnIn <sub>2</sub> Se <sub>4</sub> | 7.00/4.05 | 7.09/4.10          | 7.01/4.06          |
| ZnIn <sub>2</sub> Te <sub>4</sub> | 7.50/4.34 | 7.63/4.41          | 7.56/4.37          |
| ZIS/Se                            | 6.86/3.97 |                    |                    |
| ZISE/Te                           | 7.27/4.20 |                    |                    |

**Table S2**

The calculated bandgap of ZIX monolayer and its heterostructures by PBE, standard HSE06 ( $\alpha=0.25$ ), PBE0, PBE+SOC and HSE06 ( $\alpha=0.13$ ) functional, respectively. For comparison, the previous results were also listed. D and I represents direct bandgap semiconductors and indirect bandgap semiconductors, respectively.

| Structure                         | PBE     | HSE06<br>( $\alpha=0.25$ ) | PBE0    | PBE+<br>SOC | HSE06<br>( $\alpha=0.13$ ) | PBE<br>(Ref. 39) | HSE06<br>(Ref. 39) | HSE06<br>(Ref. 40) |
|-----------------------------------|---------|----------------------------|---------|-------------|----------------------------|------------------|--------------------|--------------------|
| ZnIn <sub>2</sub> S <sub>4</sub>  | 1.80(D) | 2.73(D)                    | 3.53(D) | 1.79(D)     | 2.34(D)                    | 1.79(D)          | 2.74(D)            | 3.00(D)            |
| ZnIn <sub>2</sub> Se <sub>4</sub> | 1.24(D) | 1.96(D)                    | 2.70(D) | 1.13(D)     | 1.64(D)                    | 1.98(D)          | 1.98(D)            | 2.20(I)            |
| ZnIn <sub>2</sub> Te <sub>4</sub> | 0.90(I) | 1.54(I)                    | 2.15(I) | 0.69(I)     | 1.22(I)                    | 0.73(I)          | 1.28(I)            | 1.42(I)            |
| ZIS/Se                            | 0.95(D) | 1.79(D)                    | 2.54(D) | 0.62(D)     | 1.43(D)                    |                  |                    |                    |
| ZISE/Te                           | 0.18(D) | 0.84(D)                    | 1.41(D) | 0.01(D)     | 0.49(D)                    |                  |                    |                    |

**Table S3**

The lattice constant and binding energy  $E_b$  of four different types of stacked heterostructures.

| Structure | $a$ (Å) | $b$ (Å) | $E_b$ (eV) |
|-----------|---------|---------|------------|
| ZIS/Se-A  | 6.86    | 3.97    | -1.46      |
| ZIS/Se-B  | 6.84    | 3.97    | -1.44      |
| ZIS/Se-C  | 6.84    | 3.96    | -1.45      |
| ZIS/Se-D  | 6.85    | 3.96    | -1.28      |
| ZISE/Te-A | 7.27    | 4.20    | -1.24      |
| ZISE/Te-B | 7.24    | 4.21    | -1.17      |
| ZISE/Te-C | 7.26    | 4.20    | -1.23      |
| ZISE/Te-D | 7.25    | 4.19    | -0.98      |
| ZIS/Te-A  | 7.10    | 4.10    | -0.60      |
| ZIS/Te-B  | 7.09    | 4.12    | -0.56      |
| ZIS/Te-C  | 7.09    | 4.10    | -0.38      |
| ZIS/Te-D  | 7.10    | 4.10    | -0.37      |

**Table S4**

Electrons and holes effective mass of ZIX (X=S, Se and Te) monolayer and its heterostructures.

| Materials | Type of carriers | $m_{\Gamma-X}^*/m_0$ | $m_{\Gamma-Y}^*/m_0$ | $m_{\Gamma-M}^*/m_0$ |
|-----------|------------------|----------------------|----------------------|----------------------|
| ZIS       | e                | 0.247                | 0.243                | 0.243                |
|           | h                | 0.365                | 2.060                | 1.588                |
| ZISe      | e                | 0.195                | 0.191                | 0.191                |
|           | h                | 0.708                | 1.449                | 4.257                |
| ZITe      | e                | 0.811                | 0.263                | 0.343                |
|           | h                | 2.425                | 1.857                | 3.223                |
| ZIS/Se    | e                | 0.180                | 0.180                | 0.180                |
|           | h                | 1.811                | 3.767                | 2.649                |
| ZISe/Te   | e                | 0.149                | 0.149                | 0.148                |
|           | h                | 4.260                | 0.814                | 2.018                |

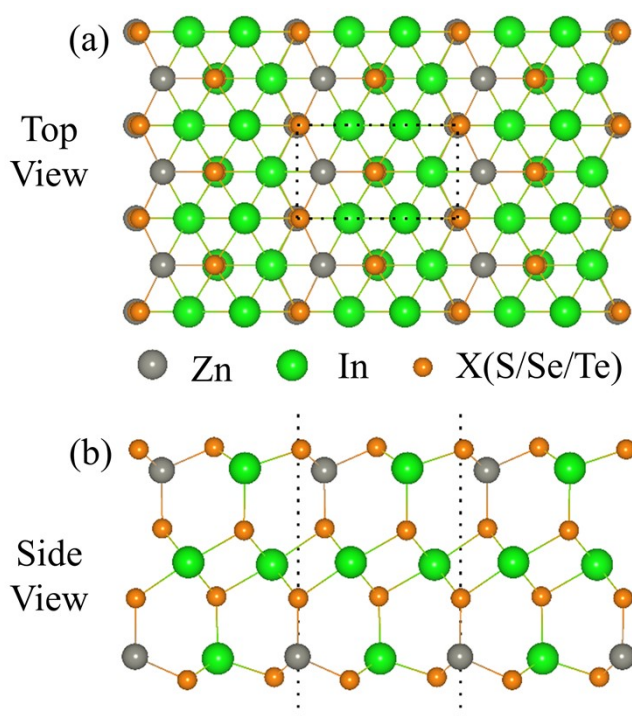**Fig. S1** A supercell of ZIX (X=S, Se and Te) monolayer. The gray, blue and orange balls represent the elements Zn, In and X, respectively.

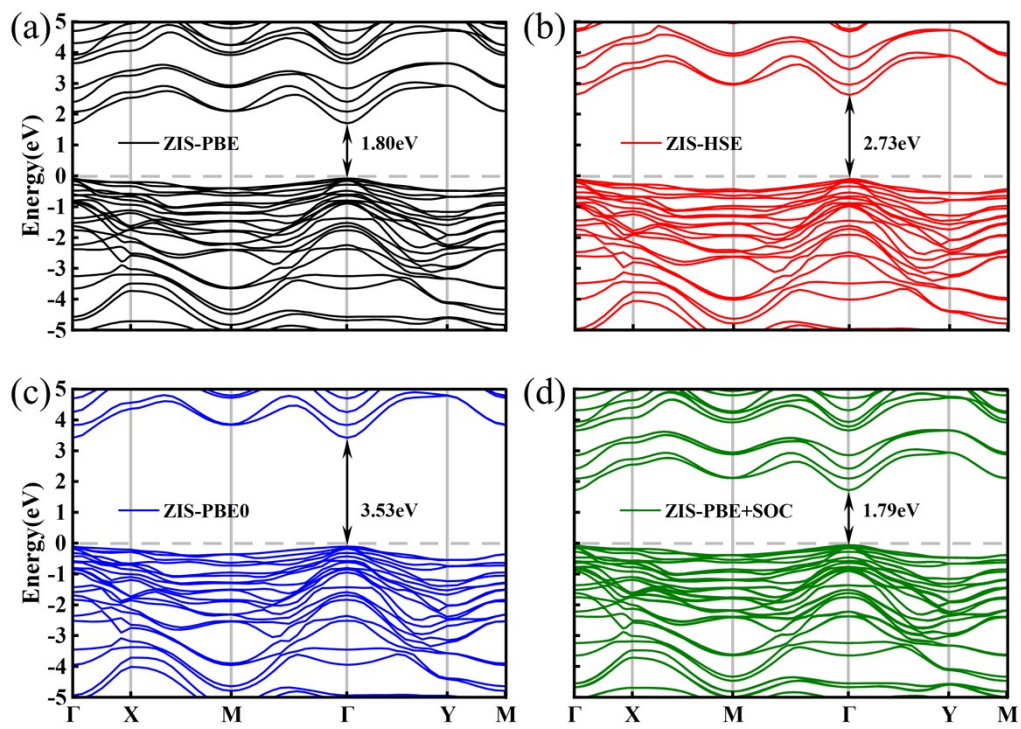

**Fig. S2** (a-d) The calculated band structures of ZIS by different functional.

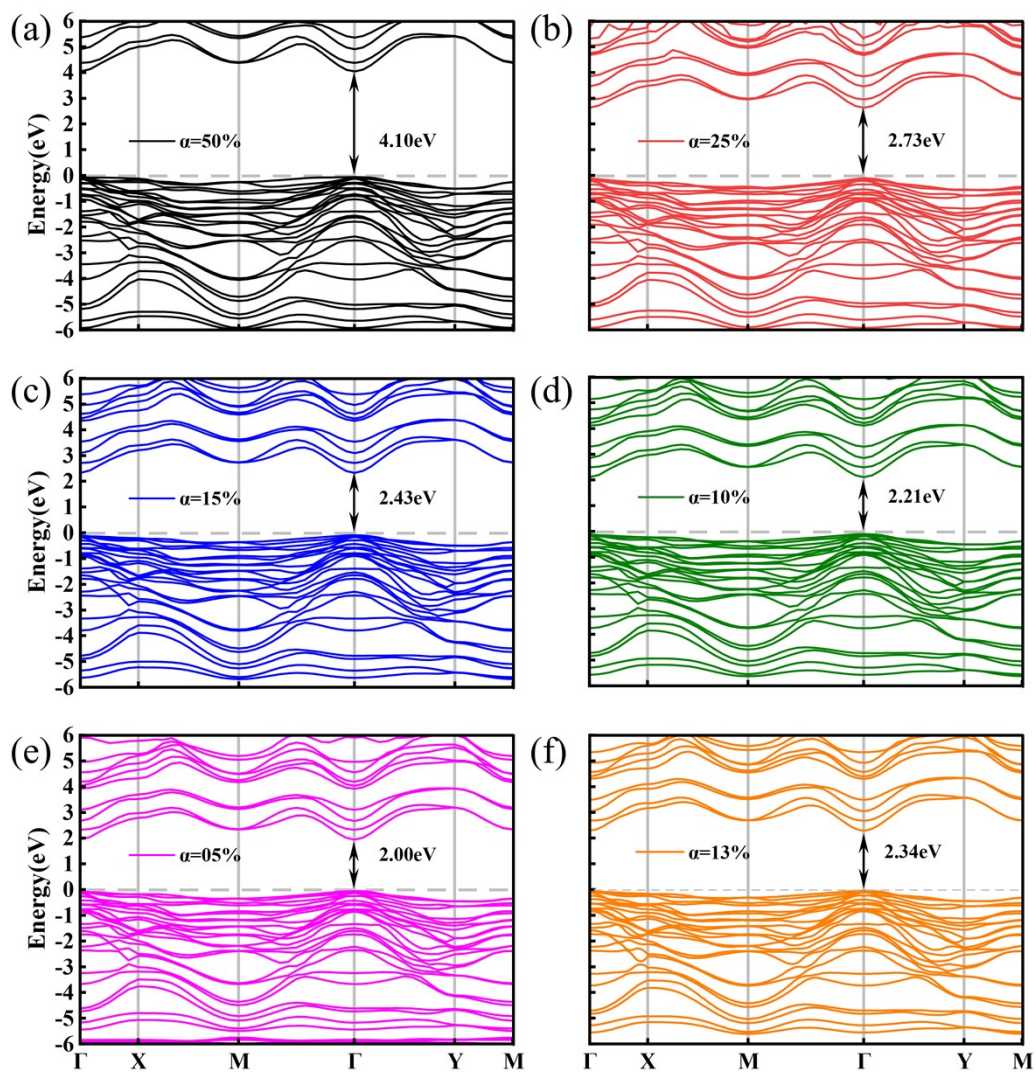

**Fig. S3** (a-e) The calculated band structures of ZIS by HSE functional with different mixing ratio.

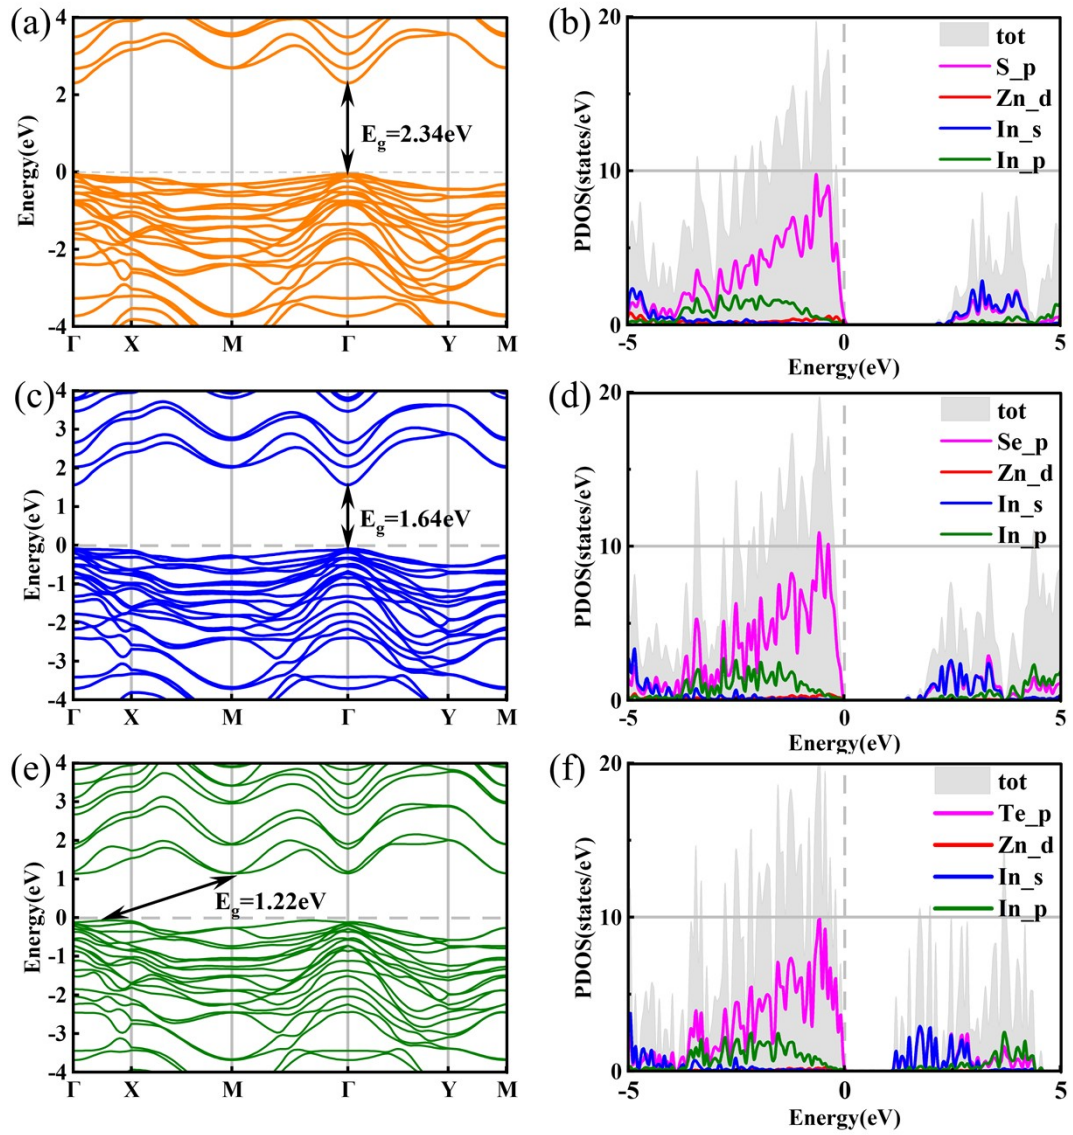

**Fig. S4** (a-c) The band structures of ZIS, ZISE, and ZITE monolayer. (d-f) The corresponding density of states (DOS) of ZIS, ZISE, and ZITE monolayer.

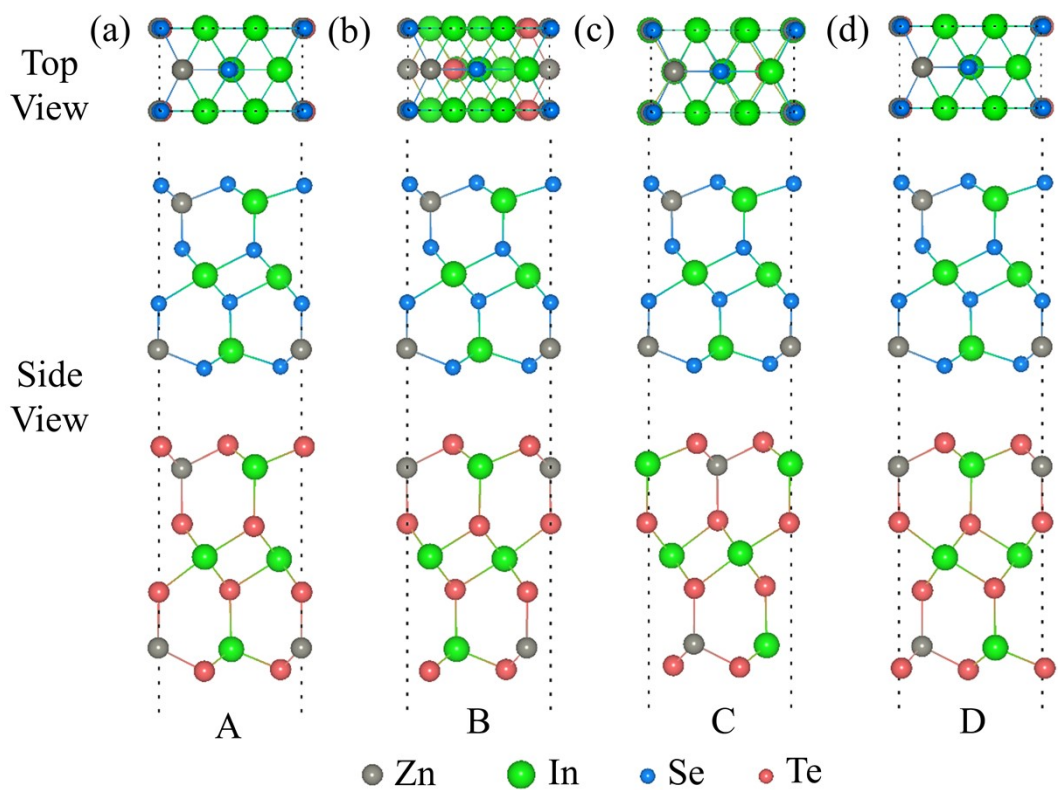

**Fig. S5** Top and side views of four different configurations of ZInSe/Te heterostructure. (a) configuration A, (b) configuration B, (c) configuration C and (d) configuration D. The gray, green, blue and red balls represent Zn, In, Se, and Te atoms, respectively.

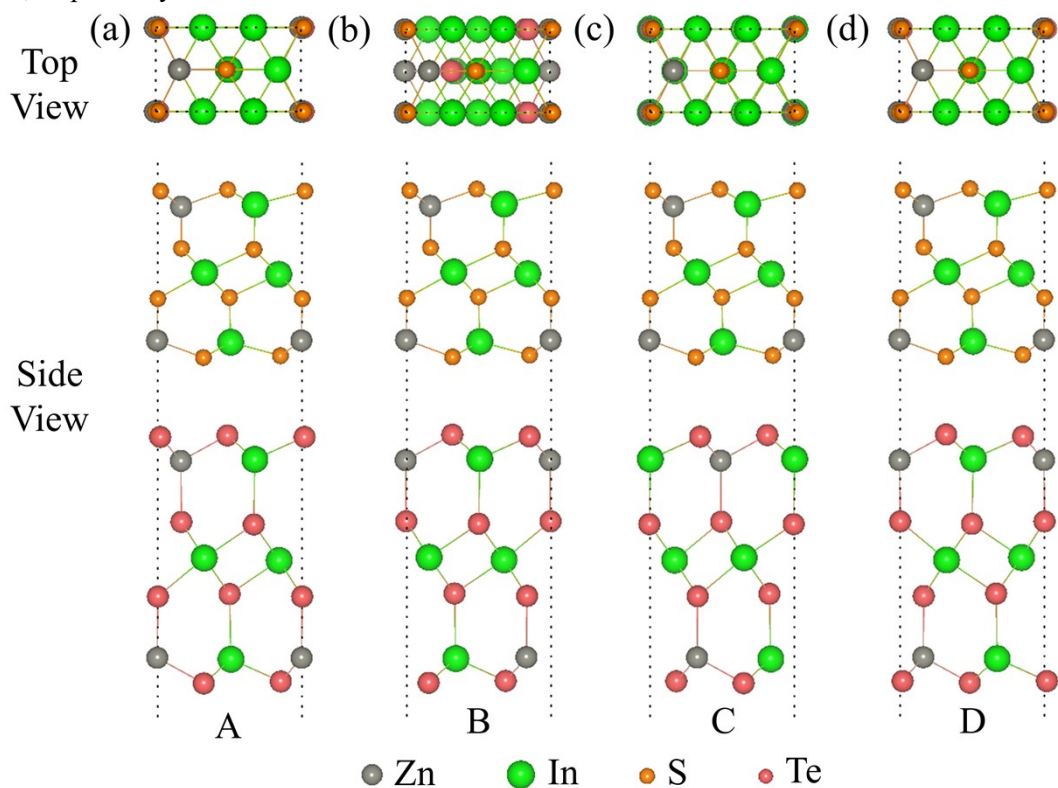

**Fig. S6** Top and side views of four different configurations of ZInS/Te heterostructure. (a) configuration A, (b) configuration B, (c) configuration C and (d) configuration D. The gray, green, orange and red balls represent Zn, In, S, and Te atoms, respectively.

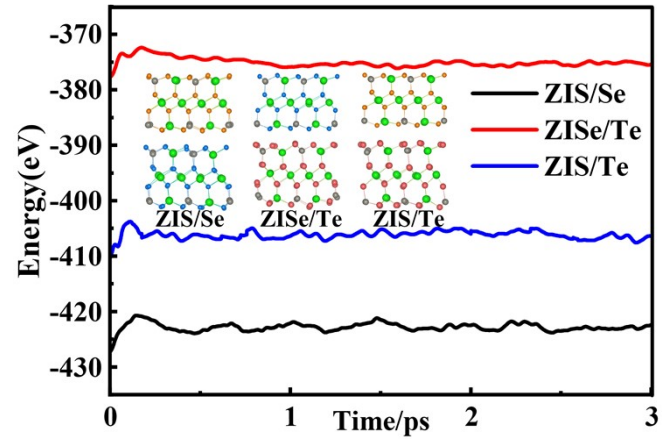

**Fig. S7** Energy changes of ZIS/Se, ZISe/Te and ZIS/Te heterostructures at 300 K FPMD simulation. The insets show the final structures after 3000fs FPMD simulation.



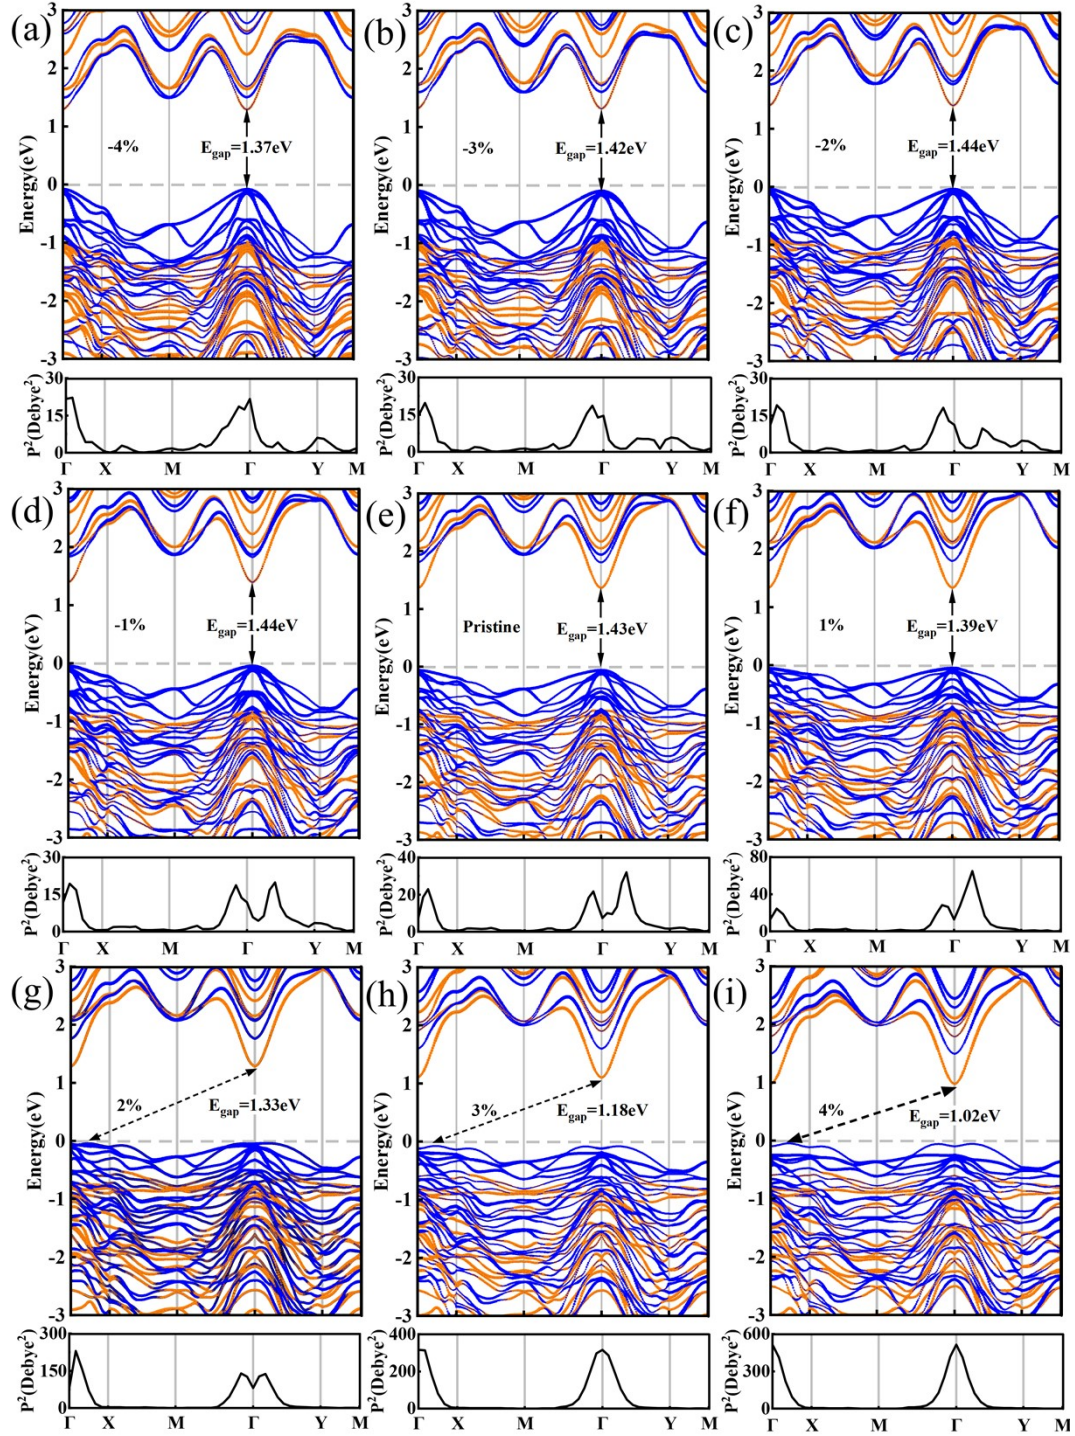

**Fig. S8** (a-i) The projected band structures and transition dipole moment (TDM) of ZIS/Se heterostructure under -4% to 4% strains.
